# Supplementary material for: Determinants of physical activity during cancer treatment: a longitudinal exploration of psycho-cognitive variables and physician counseling
Source: Springer Nature journal article supplement (doi:10.1007/s10865-023-00458-y), 2023-11-28
Supplement: MOESM2 [file 26371378]

**Title:** Determinants of physical activity during cancer treatment: A longitudinal exploration of psycho-cognitive variables and physician counseling

**Journal Name:** Journal of Behavioral Medicine

**Authors:** Alexander Haussmann, Nadine Ungar, Angeliki Tsiouris, Laura I. Schmidt, Jana Müller, Jost von Hardenberg, Joachim Wiskemann, Karen Steindorf, Monika Sieverding

**Corresponding Author:** Alexander Haussmann, German Cancer Research Center and National Center for Tumor Diseases Heidelberg, alexander.haussmann@nct-heidelberg.de

**Online Resource 2.** Unstandardized regression weights of the proposed models

| <b>Paths in Model with Physical Activity Counseling in General<sup>a</sup></b> | <b>Estimate</b> | <b>Standard Error</b> | <b>Critical Ratio</b> | <b>95% CI</b>   | <b>p-value</b> |
|--------------------------------------------------------------------------------|-----------------|-----------------------|-----------------------|-----------------|----------------|
| Activity Attitude → Intention                                                  | 0.06            | 0.09                  | 0.70                  | [-0.118; 0.238] | .486           |
| Rest Attitude → Intention                                                      | -0.14           | 0.09                  | -1.53                 | [-0.318; 0.038] | .127           |
| Subjective Norm → Intention                                                    | 0.04            | 0.03                  | 1.43                  | [-0.019; 0.099] | .154           |
| Self-Efficacy → Intention                                                      | 0.18            | 0.06                  | 3.11                  | [0.061; 0.299]  | .002           |
| Basic PA Counseling → Intention                                                | -0.05           | 0.07                  | -0.69                 | [-0.189; 0.089] | .493           |
| MVPA at t0 → Intention                                                         | -0.10           | 0.05                  | -1.92                 | [-0.199; 0.001] | .055           |
| MVPA at t0 → MVPA at t3                                                        | 0.73            | 0.07                  | 10.41                 | [0.591; 0.869]  | <.001          |
| Self-Efficacy → MVPA at t3                                                     | -0.10           | 0.08                  | -1.23                 | [-0.259; 0.059] | .219           |
| Basic PA Counseling → MVPA at t3                                               | 0.07            | 0.09                  | 0.77                  | [-0.108; 0.248] | .439           |
| Intention → MVPA at t3                                                         | 0.42            | 0.18                  | 2.33                  | [0.063; 0.777]  | .020           |
| <b>Paths in Model with In-depth Physical Activity Counseling</b>               |                 |                       |                       |                 |                |
| Activity Attitude → Intention                                                  | 0.02            | 0.09                  | 0.25                  | [-0.158; 0.198] | .801           |
| Rest Attitude → Intention                                                      | -0.15           | 0.09                  | -1.71                 | [-0.328; 0.028] | .088           |
| Subjective Norm → Intention                                                    | 0.03            | 0.03                  | 1.05                  | [-0.029; 0.089] | .296           |
| Self-Efficacy → Intention                                                      | 0.17            | 0.06                  | 3.09                  | [0.051; 0.289]  | .002           |
| In-depth PA Counseling → Intention                                             | 0.18            | 0.09                  | 2.00                  | [0.002; 0.358]  | .045           |
| MVPA at t0 → Intention                                                         | -0.09           | 0.05                  | -1.80                 | [-0.189; 0.009] | .072           |
| MVPA at t0 → MVPA at t3                                                        | 0.73            | 0.07                  | 10.42                 | [0.591; 0.869]  | <.001          |
| Self-Efficacy → MVPA at t3                                                     | -0.08           | 0.08                  | -1.11                 | [-0.239; 0.079] | .269           |
| Basic PA Counseling → MVPA t3                                                  | 0.07            | 0.13                  | 0.55                  | [-0.188; 0.328] | .584           |
| Intention → MVPA at t3                                                         | 0.37            | 0.17                  | 2.15                  | [0.033; 0.707]  | .031           |

<sup>a</sup> No differentiation between basic and in-depth physical activity counseling

Note: CI=confidence interval; MVPA = moderate-to-vigorous physical activity
