# Supplementary material for: Determinants of physical activity during cancer treatment: a longitudinal exploration of psycho-cognitive variables and physician counseling
Source: Springer Nature journal article supplement (doi:10.1007/s10865-023-00458-y), 2023-11-28
Supplement: MOESM3 [file 26371378]

**Title:** Determinants of physical activity during cancer treatment: A longitudinal exploration of psycho-cognitive variables and physician counseling

**Journal Name:** Journal of Behavioral Medicine

**Authors:** Alexander Haussmann, Nadine Ungar, Angeliki Tsiouris, Laura I. Schmidt, Jana Müller, Jost von Hardenberg, Joachim Wiskemann, Karen Steindorf, Monika Sieverding

**Corresponding Author:** Alexander Haussmann, German Cancer Research Center and National Center for Tumor Diseases Heidelberg, alexander.haussmann@nct-heidelberg.de

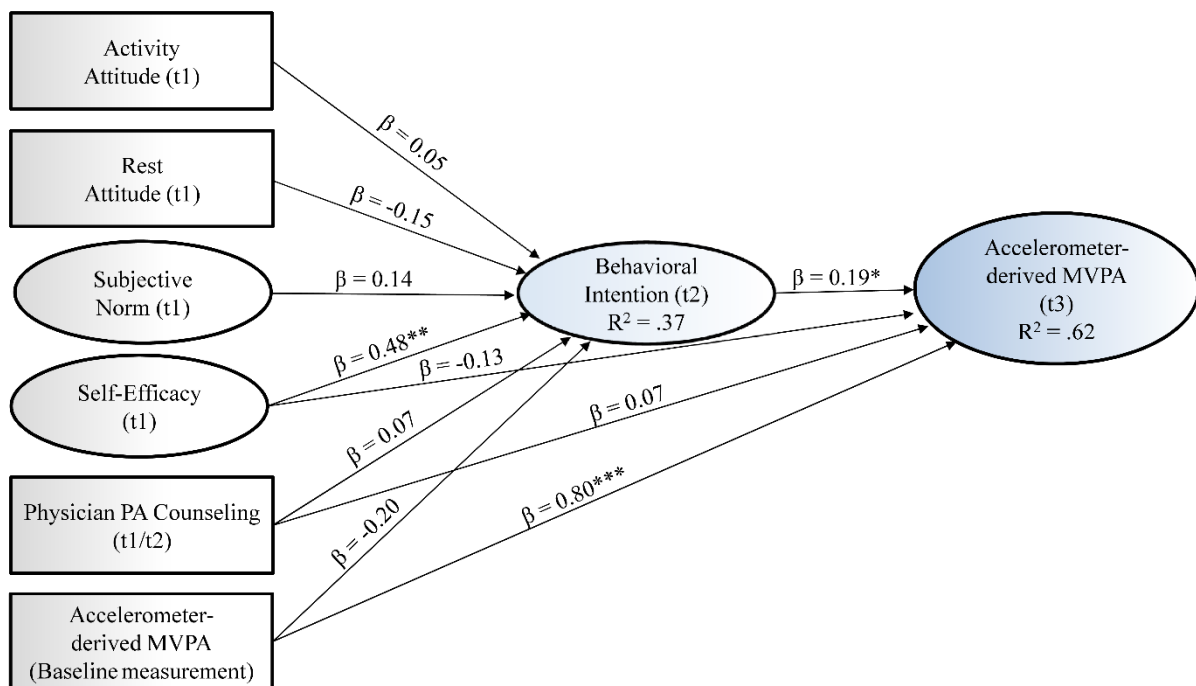

**Online Resource 3.** Structural equation model with Theory of Planned Behavior variables, physician physical activity counseling (i.e., basic or in-depth counseling) and accelerometer-derived moderate-to-vigorous physical activity.

*Note:* Standardized structural coefficients are shown. Measurement model and covariances between all variables are not displayed. MVPA=moderate-to-vigorous physical activity; PA=physical activity;  $R^2$ =explained variance; \* $p < .05$ ; \*\* $p < .01$ ; \*\*\* $p < .001$ .
