# Supplementary material for: Determinants of physical activity during cancer treatment: a longitudinal exploration of psycho-cognitive variables and physician counseling
Source: Springer Nature journal article supplement (doi:10.1007/s10865-023-00458-y), 2023-11-28
Supplement: MOESM4 [file 26371378]

**Title:** Determinants of physical activity during cancer treatment: A longitudinal exploration of psycho-cognitive variables and physician counseling

**Journal Name:** Journal of Behavioral Medicine

**Authors:** Alexander Haussmann, Nadine Ungar, Angeliki Tsiouris, Laura I. Schmidt, Jana Müller, Jost von Hardenberg, Joachim Wiskemann, Karen Steindorf, Monika Sieverding

**Corresponding Author:** Alexander Haussmann, German Cancer Research Center and National Center for Tumor Diseases Heidelberg, alexander.haussmann@nct-heidelberg.de

**Online Resource 4.** Model fits of the proposed models

| Fit Index | Cut-off Value <sup>a</sup> | Model: Counseling in General <sup>b</sup> | Model: In-depth Counseling |
|-----------|----------------------------|-------------------------------------------|----------------------------|
| $\chi^2$  |                            | 57.86**                                   | 51.05*                     |
| CMIN/df   | $\leq 3.0$                 | 1.70                                      | 1.50                       |
| CFI       | $\geq 0.9$                 | 0.96                                      | 0.97                       |
| TLI       | $\geq 0.9$                 | 0.91                                      | 0.93                       |
| RMSEA     | $\leq 0.08$                | 0.08                                      | 0.07                       |

<sup>a</sup>Cut-off values for good model fit

<sup>b</sup>No differentiation between basic and in-depth physical activity counseling

Note: \* =  $\chi^2$  test:  $p < .05$ ; \*\* =  $\chi^2$  test:  $p < .01$ ; CMIN/df = Ratio of Chi squared value and degrees of freedom; CFI = Comparative Fit Index; TLI = Tucker-Lewis Index; RMSEA = Root Mean Square Error of Approximation.
