# Supplementary material for: Determinants of physical activity during cancer treatment: a longitudinal exploration of psycho-cognitive variables and physician counseling
Source: Springer Nature journal article supplement (doi:10.1007/s10865-023-00458-y), 2023-11-28
Supplement: MOESM5 [file 26371378]

**Title:** Determinants of physical activity during cancer treatment: A longitudinal exploration of psycho-cognitive variables and physician counseling

**Journal Name:** Journal of Behavioral Medicine

**Authors:** Alexander Haussmann, Nadine Ungar, Angeliki Tsiouris, Laura I. Schmidt, Jana Müller, Jost von Hardenberg, Joachim Wiskemann, Karen Steindorf, Monika Sieverding

**Corresponding Author:** Alexander Haussmann, German Cancer Research Center and National Center for Tumor Diseases Heidelberg, alexander.haussmann@nct-heidelberg.de

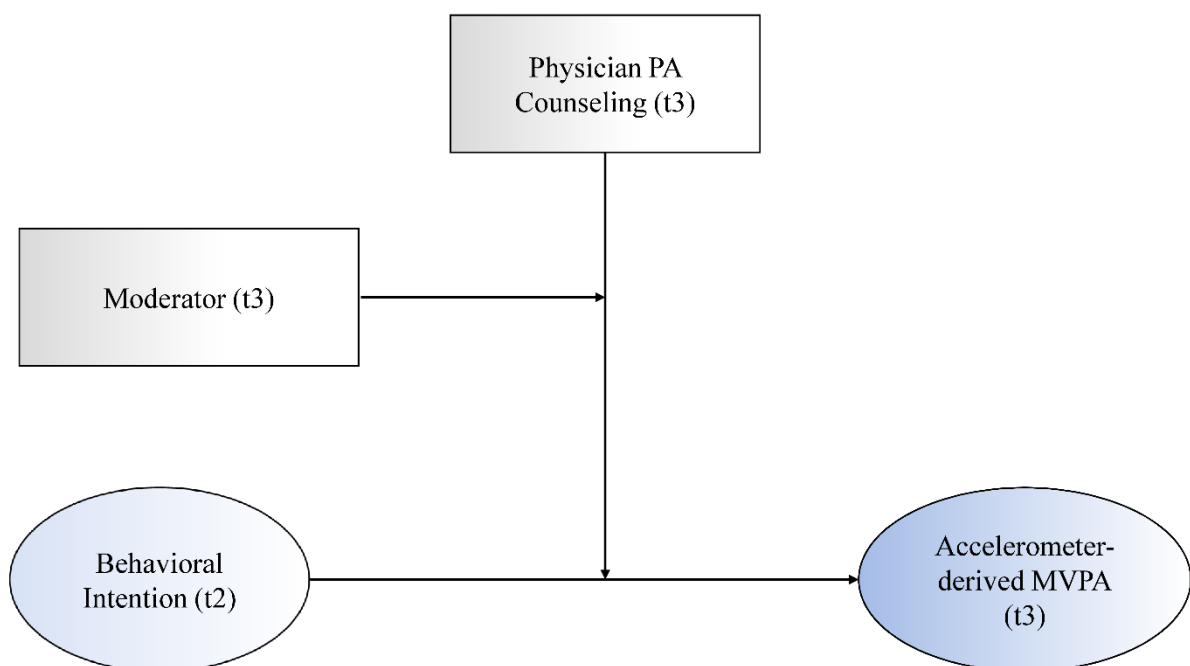

**Online Resource 5.** Conceptual research model with the three-way interaction of physician physical activity counseling (t3) and a moderator (i.e., sociodemographic or disease-related characteristic) (t3) regarding the effect of participants' intention for physical activity (t2) on their moderate-to-vigorous physical activity (t3).

*Note:* MVPA=moderate-to-vigorous physical activity; PA=physical activity.
