# Supplementary material for: Determinants of physical activity during cancer treatment: a longitudinal exploration of psycho-cognitive variables and physician counseling
Source: Springer Nature journal article supplement (doi:10.1007/s10865-023-00458-y), 2023-11-28
Supplement: MOESM6 [file 26371378]

**Title:** Determinants of physical activity during cancer treatment: A longitudinal exploration of psycho-cognitive variables and physician counseling

**Journal Name:** Journal of Behavioral Medicine

**Authors:** Alexander Haussmann, Nadine Ungar, Angeliki Tsiouris, Laura I. Schmidt, Jana Müller, Jost von Hardenberg, Joachim Wiskemann, Karen Steindorf, Monika Sieverding

**Corresponding Author:** Alexander Haussmann, German Cancer Research Center and National Center for Tumor Diseases Heidelberg, alexander.haussmann@nct-heidelberg.de

**Online Resource 6.** Moderated-moderation regression coefficients and confidence intervals for predicting moderate-to-vigorous physical activity per week (t3)

| <b>Interaction</b>                                                     | <b><math>\beta</math></b> | <b>SE</b> | <b>95% CI</b>  | <b>p</b> |
|------------------------------------------------------------------------|---------------------------|-----------|----------------|----------|
| Intention t2 x Physician Counseling <sup>a</sup> t3                    | 0.10                      | 0.30      | [-0.49; 0.69]  | .740     |
| Intention t2 x Health Status <sup>b</sup> t3                           | -0.26                     | 0.13      | [-0.51; -0.02] | .038     |
| Physician Counseling <sup>a</sup> t3 x Health Status <sup>b</sup> t3   | -0.13                     | 0.14      | [-0.41; 0.16]  | .395     |
| Intention t2 x Physician Counseling <sup>a</sup> t3 x Health Status t3 | 0.86                      | 0.27      | [0.33; 1.39]   | .002     |

*Note:*  $\beta$ =standardized regression coefficient; SE=standard error; CI=confidence interval; Analyses performed using the PROCESS macro for SPSS (Model 3; Hayes 2022). Model includes age, sex, BMI (t2), metastasis, current chemotherapy, sum of side effects (t3), self-efficacy (t1; mean), and moderate-to-vigorous physical activity (baseline measurement) as control variables; intention and moderate-to-vigorous physical activity per week were transformed using their natural logarithm.

<sup>a</sup> No=0; yes=1 (no differentiation between basic and in-depth physical activity counseling)

<sup>b</sup> Assessed via Short-Form-Health-Survey-12
